# Supplementary material for: Antibiotic Combination to Effectively Postpone or Inhibit the In Vitro Induction and Selection of Levofloxacin-Resistant Mutants in Elizabethkingia anophelis
Source: MDPI journal article supplement (doi:10.3390/ijms25042215), 2024-02-12
Supplement: s1 [file s1]

**Supplemental Figure S1.** Phylogenetic tree showing the four isolates belong to different clones, among 27 clones of *E. anophelis*

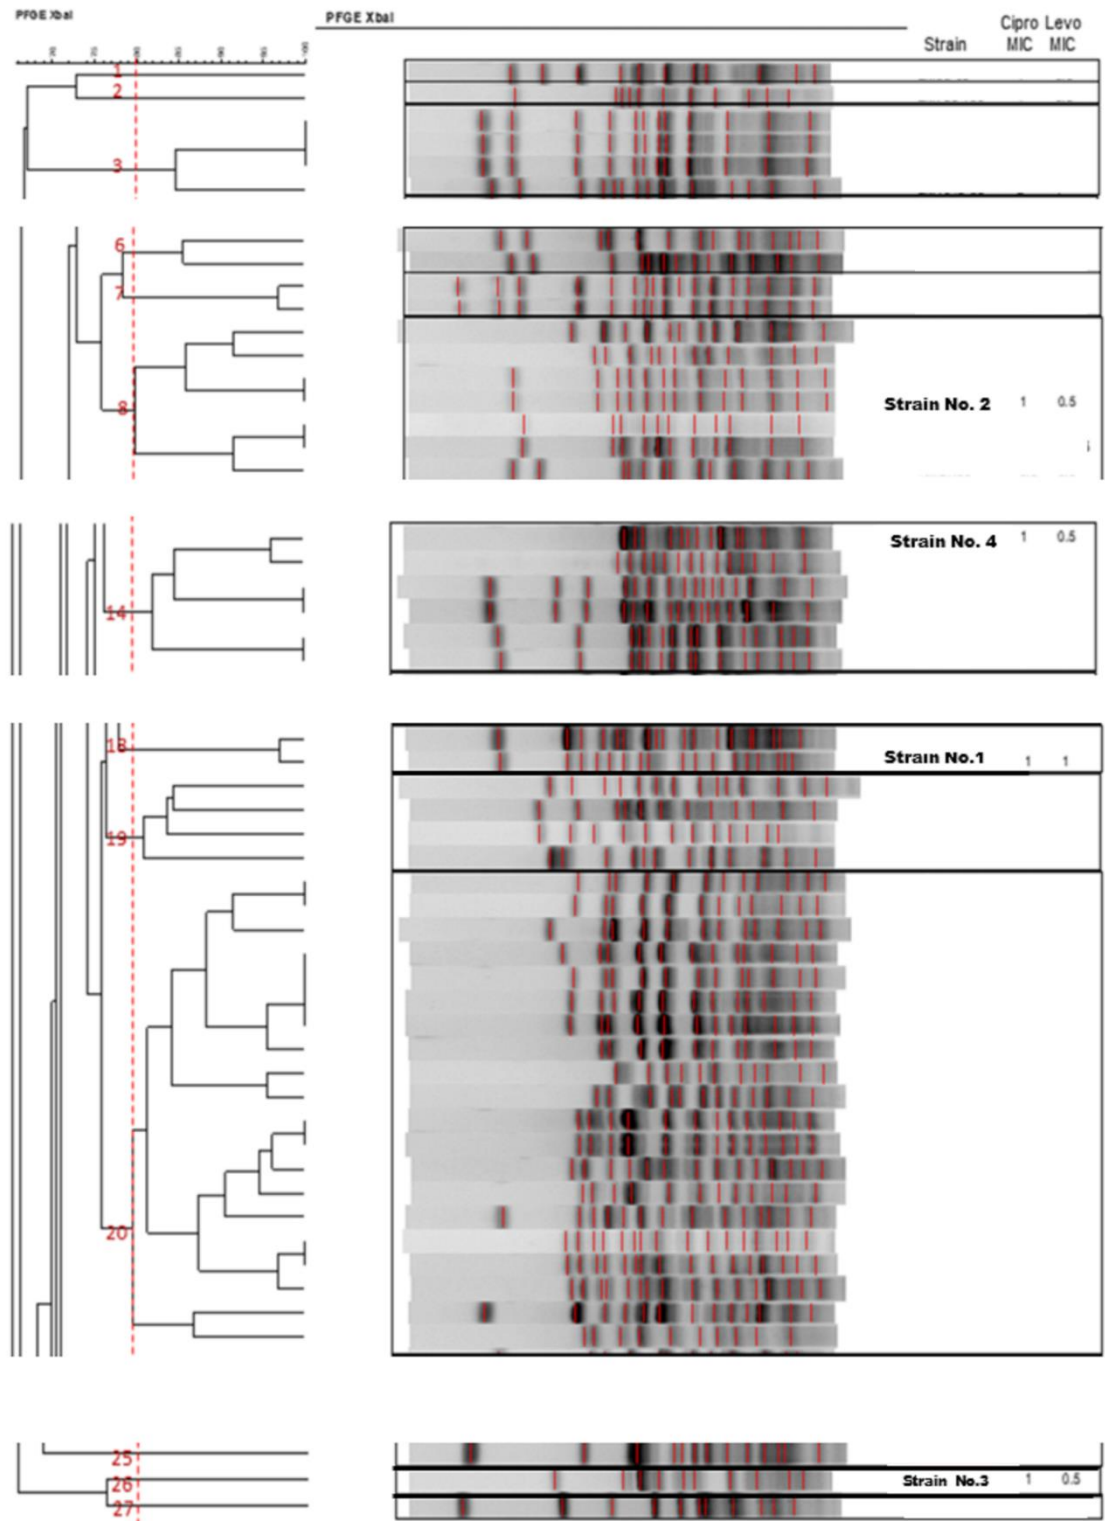

**Supplemental Figure S2.** Levofloxacin MICs for levofloxacin alone and its combination in each induction cycle

| susceptible  |     | intermediate                               |     |     | resistant |     |   |   |  |
|--------------|-----|--------------------------------------------|-----|-----|-----------|-----|---|---|--|
| Levofloxacin |     | Levofloxacin MIC (mg/L) of mutant in steps |     |     |           |     |   |   |  |
| Strain No.   | 0   | 1                                          | 2   | 3   | 4         | 5   | 6 | 7 |  |
| 1            | 1   | 4                                          | 64  | 512 |           |     |   |   |  |
| 2            | 0.5 | 64                                         | 256 | 256 | 512       |     |   |   |  |
| 3            | 0.5 | 32                                         | 256 | 512 |           |     |   |   |  |
| 4            | 0.5 | 8                                          | 128 | 128 | 128       | 512 |   |   |  |

| Levofloxacin+0.5x MIC Mino |     | Levofloxacin MIC (mg/L) of mutant in steps |    |     |     |    |    |    |  |
|----------------------------|-----|--------------------------------------------|----|-----|-----|----|----|----|--|
| Strain No.                 | 0   | 1                                          | 2  | 3   | 4   | 5  | 6  | 7  |  |
| 1                          | 0.5 | 4                                          | 64 | 128 | 512 |    |    |    |  |
| 2                          | 1   | 2                                          | 2  | 2   | 4   | 4  | 4  | 4  |  |
| 3                          | 1   | 2                                          | 2  | 4   | 512 |    |    |    |  |
| 4                          | 1   | 1                                          | 1  | 4   | 4   | 32 | 32 | 32 |  |

| Levofloxacin +1x MIC Mino |     | Levofloxacin MIC (mg/L) of mutant in steps |   |   |   |    |    |    |  |
|---------------------------|-----|--------------------------------------------|---|---|---|----|----|----|--|
| Strain No.                | 0   | 1                                          | 2 | 3 | 4 | 5  | 6  | 7  |  |
| 1                         | 0.5 | 4                                          | 8 | 8 | 8 | 64 | 64 | 64 |  |
| 2                         | 1   | 2                                          | 2 | 2 | 4 | 4  | 4  | 4  |  |
| 3                         | 1   | 2                                          | 2 | 2 | 2 | 2  | 2  | 1  |  |
| 4                         | 1   | 1                                          | 1 | 2 | 2 | 2  | 2  | 2  |  |

| Levofloxacin + 0.5x MIC Rif |     | Levofloxacin MIC (mg/L) of mutant in steps |   |   |   |   |   |   |  |
|-----------------------------|-----|--------------------------------------------|---|---|---|---|---|---|--|
| Strain No.                  | 0   | 1                                          | 2 | 3 | 4 | 5 | 6 | 7 |  |
| 1                           | 0.5 | 4                                          | 8 | 8 | 8 | 8 | 8 | 8 |  |
| 2                           | 1   | 2                                          | 2 | 2 | 4 | 4 | 4 | 4 |  |
| 3                           | 1   | 2                                          | 2 | 2 | 2 | 2 | 2 | 2 |  |
| 4                           | 1   | 1                                          | 1 | 2 | 2 | 2 | 2 | 2 |  |

| Levofloxacin + 1x MIC Rif |     | Levofloxacin MIC (mg/L) of mutant in steps |   |   |   |   |   |   |  |
|---------------------------|-----|--------------------------------------------|---|---|---|---|---|---|--|
| Strain No.                | 0   | 1                                          | 2 | 3 | 4 | 5 | 6 | 7 |  |
| 1                         | 0.5 | 4                                          | 8 | 8 | 8 | 8 | 8 | 8 |  |
| 2                         | 1   | 2                                          | 5 | 2 | 4 | 4 | 4 | 4 |  |
| 3                         | 1   | 2                                          | 5 | 2 | 2 | 2 | 2 | 2 |  |
| 4                         | 1   | 1                                          | 1 | 2 | 2 | 2 | 2 | 2 |  |

| Levofloxacin + 0.5 x MIC Cef/Sul |     | Levofloxacin MIC (mg/L) of mutant in steps |   |   |    |    |    |    |  |
|----------------------------------|-----|--------------------------------------------|---|---|----|----|----|----|--|
| Strain No.                       | 0   | 1                                          | 2 | 3 | 4  | 5  | 6  | 7  |  |
| 1                                | 0.5 | 4                                          | 8 | 8 | 8  | 8  | 8  | 3  |  |
| 2                                | 1   | 4                                          | 8 | 8 | 16 | 16 | 16 | 16 |  |
| 3                                | 1   | 2                                          | 2 | 2 | 2  | 2  | 2  | 2  |  |
| 4                                | 1   | 1                                          | 1 | 2 | 2  | 2  | 2  | 2  |  |

| Levofloxacin + 1 x MIC Cef/Sul |     | Levofloxacin MIC (mg/L) of mutant in steps |   |   |   |   |   |   |  |
|--------------------------------|-----|--------------------------------------------|---|---|---|---|---|---|--|
| Strain No.                     | 0   | 1                                          | 2 | 3 | 4 | 5 | 6 | 7 |  |
| 1                              | 0.5 | 4                                          | 8 | 8 | 8 | 8 | 8 | 8 |  |
| 2                              | 1   | 2                                          | 2 | 2 | 4 | 8 | 8 | 8 |  |
| 3                              | 1   | 2                                          | 2 | 2 | 2 | 2 | 2 | 2 |  |
| 4                              | 1   | 1                                          | 1 | 2 | 2 | 2 | 2 | 2 |  |

| Levofloxacin + 0.5 x MIC Sul/Tri |     | Levofloxacin MIC (mg/L) of mutant in steps |   |   |     |     |     |     |  |
|----------------------------------|-----|--------------------------------------------|---|---|-----|-----|-----|-----|--|
| Strain No.                       | 0   | 1                                          | 2 | 3 | 4   | 5   | 6   | 7   |  |
| 1                                | 0.5 | 2                                          | 8 | 8 | 8   | 8   | 8   | 8   |  |
| 2                                | 1   | 4                                          | 4 | 4 | 4   | 8   | 8   | 8   |  |
| 3                                | 1   | 2                                          | 2 | 8 | 128 | 128 | 512 | 512 |  |
| 4                                | 1   | 1                                          | 1 | 2 | 2   | 2   | 2   | 2   |  |

| Levofloxacin + 1 x MIC Sul/Tri |     | Levofloxacin MIC (mg/L) of mutant in steps |   |   |   |   |   |   |  |
|--------------------------------|-----|--------------------------------------------|---|---|---|---|---|---|--|
| Strain No.                     | 0   | 1                                          | 2 | 3 | 4 | 5 | 6 | 7 |  |
| 1                              | 0.5 | 2                                          | 8 | 8 | 8 | 8 | 8 | 8 |  |
| 2                              | 1   | 4                                          | 4 | 4 | 4 | 8 | 8 | 8 |  |
| 3                              | 1   | 2                                          | 2 | 2 | 2 | 2 | 2 | 2 |  |
| 4                              | 1   | 1                                          | 1 | 2 | 2 | 2 | 2 | 2 |  |

Cef/Sul = cefoperazone/sulbactam; Mino = minocycline; MIC = minimum inhibitory concentration; Rif = rifampin; Sul/Tri = sulfamethoxazole/trimethoprim.

**Supplemental Figure S3.** The MICs of antimicrobials in combination with levofloxacin in each induction cycle.

| Levofloxacin + 0.5 X MIC Mino |  | Minocycline MIC (mg/L) of mutant in steps |      |     |     |     |     |     |     |
|-------------------------------|--|-------------------------------------------|------|-----|-----|-----|-----|-----|-----|
| Strain No.                    |  | 0                                         | 1    | 2   | 3   | 4   | 5   | 6   | 7   |
| 1                             |  | 0.25                                      | 0.5  | 1   | 1   | 1   |     |     |     |
| 2                             |  | 0.5                                       | 0.5  | 0.5 | 0.5 | 0.5 | 0.5 | 0.5 | 0.5 |
| 3                             |  | 0.25                                      | 0.5  | 0.5 | 2   | 2   | 2   |     |     |
| 4                             |  | 0.25                                      | 0.25 | 0.5 | 1   | 1   | 2   | 2   | 2   |

  

| Levofloxacin + 1 x MIC Mino |  | Minocycline MIC (mg/L) of mutant in steps |      |      |      |      |      |      |      |
|-----------------------------|--|-------------------------------------------|------|------|------|------|------|------|------|
| Strain No.                  |  | 0                                         | 1    | 2    | 3    | 4    | 5    | 6    | 7    |
| 1                           |  | 0.25                                      | 0.5  | 1    | 1    | 1    | 1    | 1    | 1    |
| 2                           |  | 0.5                                       | 0.5  | 0.5  | 0.5  | 0.5  | 0.5  | 0.5  | 0.5  |
| 3                           |  | 0.25                                      | 0.5  | 0.5  | 0.5  | 0.5  | 0.5  | 0.5  | 0.5  |
| 4                           |  | 0.25                                      | 0.25 | 0.25 | 0.25 | 0.25 | 0.25 | 0.25 | 0.25 |

  

| Levofloxacin + 0.5 x MIC Rif |  | Rifampine MIC (mg/L) of mutant in steps |      |      |     |     |     |     |     |
|------------------------------|--|-----------------------------------------|------|------|-----|-----|-----|-----|-----|
| Strain No.                   |  | 0                                       | 1    | 2    | 3   | 4   | 5   | 6   | 7   |
| 1                            |  | 0.25                                    | 1    | 1    | 1   | 1   | 1   | 1   | 1   |
| 2                            |  | 0.5                                     | 0.5  | 0.5  | 0.5 | 0.5 | 0.5 | 0.5 | 0.5 |
| 3                            |  | 0.5                                     | 0.5  | 0.5  | 1   | 1   | 1   | 1   | 1   |
| 4                            |  | 0.25                                    | 0.25 | 0.25 | 0.5 | 0.5 | 0.5 | 0.5 | 0.5 |

  

| Levofloxacin + 1 x MIC Rif |  | Rifampine MIC (mg/L) of mutant in steps |      |      |     |     |     |     |     |
|----------------------------|--|-----------------------------------------|------|------|-----|-----|-----|-----|-----|
| Strain No.                 |  | 0                                       | 1    | 2    | 3   | 4   | 5   | 6   | 7   |
| 1                          |  | 0.25                                    | 1    | 1    | 1   | 1   | 1   | 1   | 1   |
| 2                          |  | 0.5                                     | 0.5  | 0.5  | 0.5 | 0.5 | 0.5 | 0.5 | 0.5 |
| 3                          |  | 0.5                                     | 0.5  | 0.5  | 1   | 1   | 1   | 1   | 1   |
| 4                          |  | 0.25                                    | 0.25 | 0.25 | 0.5 | 0.5 | 0.5 | 0.5 | 0.5 |

  

| Levofloxacin + 0.5 x MIC Cef/Sul |  | Brosym MIC (mg/L) of mutant in steps |     |     |     |     |     |     |     |
|----------------------------------|--|--------------------------------------|-----|-----|-----|-----|-----|-----|-----|
| Strain No.                       |  | 0                                    | 1   | 2   | 3   | 4   | 5   | 6   | 7   |
| 1                                |  | 16                                   | 128 | 128 | 128 | 128 | 128 | 128 | 128 |
| 2                                |  | 256                                  | 256 | 256 | 256 | 256 | 256 | 256 | 256 |
| 3                                |  | 256                                  | 256 | 256 | 256 | 256 | 256 | 256 | 256 |
| 4                                |  | 256                                  | 256 | 256 | 256 | 256 | 256 | 256 | 256 |

  

| Levofloxacin + 1 x MIC Cef/Sul |  | Brosym MIC (mg/L) of mutant in steps |     |     |     |     |     |     |     |
|--------------------------------|--|--------------------------------------|-----|-----|-----|-----|-----|-----|-----|
| Strain No.                     |  | 0                                    | 1   | 2   | 3   | 4   | 5   | 6   | 7   |
| 1                              |  | 16                                   | 128 | 128 | 128 | 128 | 128 | 128 | 128 |
| 2                              |  | 256                                  | 256 | 256 | 256 | 256 | 256 | 256 | 256 |
| 3                              |  | 256                                  | 256 | 256 | 256 | 256 | 256 | 256 | 256 |
| 4                              |  | 256                                  | 256 | 256 | 256 | 256 | 256 | 256 | 256 |

  

| Levofloxacin + 0.5 x MIC Sul/Tri |  | SXT MIC (mg/L) of mutant in steps |     |     |     |     |     |     |     |
|----------------------------------|--|-----------------------------------|-----|-----|-----|-----|-----|-----|-----|
| Strain No.                       |  | 0                                 | 1   | 2   | 3   | 4   | 5   | 6   | 7   |
| 1                                |  | 16                                | >32 | >32 | >32 | >32 | >32 | >32 | >32 |
| 2                                |  | 8                                 | >32 | >32 | >32 | >32 | >32 | >32 | >32 |
| 3                                |  | 2                                 | >32 | >32 | >32 | >32 | >32 | >32 | >32 |
| 4                                |  | 4                                 | >32 | >32 | >32 | >32 | >32 | >32 | >32 |

  

| Levofloxacin + 1 x MIC Sul/Tri |  | SXT MIC (mg/L) of mutant in steps |     |     |     |     |     |     |     |
|--------------------------------|--|-----------------------------------|-----|-----|-----|-----|-----|-----|-----|
| Strain No.                     |  | 0                                 | 1   | 2   | 3   | 4   | 5   | 6   | 7   |
| 1                              |  | 16                                | >32 | >32 | >32 | >32 | >32 | >32 | >32 |
| 2                              |  | 8                                 | >32 | >32 | >32 | >32 | >32 | >32 | >32 |
| 3                              |  | 2                                 | >32 | >32 | >32 | >32 | >32 | >32 | >32 |
| 4                              |  | 4                                 | >32 | >32 | >32 | >32 | >32 | >32 | >32 |

Cef/Sul = cefoperazone/sulbactam; Mino = minocycline; MIC = minimum inhibitory concentration; Rif = rifampin; Sul/Tri = sulfamethoxazole/trimethoprim.

**Supplemental Table S1.** The minimum inhibitory concentrations (MICs) of levofloxacin against *E. anophelis* and point mutation in quinolone resistance-determining regions in each step of multicycle induction and mutant selection by levofloxacin plus rifampin (0.5× and

| Levofloxacin +1× MIC Rifampin |       |                         |                                         |                                        | Levofloxacin +0.5× MIC Rifampin |       |                         |                                         |                                        |
|-------------------------------|-------|-------------------------|-----------------------------------------|----------------------------------------|---------------------------------|-------|-------------------------|-----------------------------------------|----------------------------------------|
| Strain                        | Cycle | Levofloxacin MIC (mg/L) | Point mutation in Gyr A ( <i>gyrA</i> ) | Point mutation in GyrB ( <i>gyrB</i> ) | Strain <sup>s</sup>             | Cycle | levofloxacin MIC (mg/L) | Point mutation in Gyr A ( <i>gyrA</i> ) | Point mutation in GyrB ( <i>gyrB</i> ) |
| No. 1                         | 0     | 0.5                     | N/D                                     | N/D                                    | No. 1                           | 0     | 0.5                     | N/D                                     | N/D                                    |
|                               | 1     | 4                       | N/D                                     | N/D                                    |                                 | 1     | 4                       | N/D                                     | N/D                                    |
|                               | 2     | 8                       | N/D                                     | N/D                                    |                                 | 2     | 8                       | N/D                                     | N/D                                    |
|                               | 3     | 8                       | N/D                                     | N/D                                    |                                 | 3     | 8                       | N/D                                     | N/D                                    |
|                               | 4     | 8                       | N/D                                     | N/D                                    |                                 | 4     | 8                       | N/D                                     | N/D                                    |
|                               | 5     | 8                       | N/D                                     | N/D                                    |                                 | 5     | 8                       | N/D                                     | N/D                                    |
|                               | 6     | 8                       | N/D                                     | N/D                                    |                                 | 6     | 8                       | N/D                                     | N/D                                    |
|                               | 7     | 8                       | N/D                                     | N/D                                    |                                 | 7     | 8                       | N/D                                     | N/D                                    |
| No. 2                         | 0     | 1                       | N/D                                     | N/D                                    | No. 2                           | 0     | 1                       | N/D                                     | N/D                                    |
|                               | 1     | 2                       | N/D                                     | N/D                                    |                                 | 1     | 2                       | N/D                                     | N/D                                    |
|                               | 2     | 2                       | N/D                                     | N/D                                    |                                 | 2     | 2                       | N/D                                     | N/D                                    |
|                               | 3     | 2                       | N/D                                     | N/D                                    |                                 | 3     | 2                       | N/D                                     | N/D                                    |
|                               | 4     | 4                       | N/D                                     | N/D                                    |                                 | 4     | 4                       | N/D                                     | N/D                                    |
|                               | 5     | 4                       | N/D                                     | N/D                                    |                                 | 5     | 4                       | N/D                                     | N/D                                    |
|                               | 6     | 4                       | N/D                                     | N/D                                    |                                 | 6     | 4                       | N/D                                     | N/D                                    |
|                               | 7     | 4                       | N/D                                     | N/D                                    |                                 | 7     | 4                       | N/D                                     | N/D                                    |
| No. 3                         | 0     | 1                       | N/D                                     | N/D                                    | No. 3                           | 0     | 1                       | N/D                                     | N/D                                    |
|                               | 1     | 2                       | N/D                                     | N/D                                    |                                 | 1     | 2                       | N/D                                     | N/D                                    |

|       |   |   |     |     |       |   |   |     |     |
|-------|---|---|-----|-----|-------|---|---|-----|-----|
| No. 4 | 2 | 2 | N/D | N/D | No. 4 | 2 | 2 | N/D | N/D |
|       | 3 | 2 | N/D | N/D |       | 3 | 2 | N/D | N/D |
|       | 4 | 2 | N/D | N/D |       | 4 | 2 | N/D | N/D |
|       | 5 | 2 | N/D | N/D |       | 5 | 2 | N/D | N/D |
|       | 6 | 2 | N/D | N/D |       | 6 | 2 | N/D | N/D |
|       | 7 | 2 | N/D | N/D |       | 7 | 2 | N/D | N/D |
|       | 0 | 1 | N/D | N/D |       | 0 | 1 | N/D | N/D |
|       | 1 | 1 | N/D | N/D |       | 1 | 1 | N/D | N/D |
|       | 2 | 1 | N/D | N/D |       | 2 | 1 | N/D | N/D |
|       | 3 | 2 | N/D | N/D |       | 3 | 2 | N/D | N/D |
|       | 4 | 2 | N/D | N/D |       | 4 | 2 | N/D | N/D |
|       | 5 | 2 | N/D | N/D |       | 5 | 2 | N/D | N/D |
|       | 6 | 2 | N/D | N/D |       | 6 | 2 | N/D | N/D |
|       | 7 | 2 | N/D | N/D |       | 7 | 2 | N/D | N/D |
|       |   |   |     |     |       |   |   |     |     |

---

**Supplemental Table S2.** The minimum inhibitory concentrations (MICs) of levofloxacin against *E. anophelis* and point mutation in quinolone resistance-determining regions in each step of multicycle induction and mutant selection by levofloxacin plus cefoperazone/sulbactam (0.5× and 1×MIC)

| Levofloxacin + 1× MIC cefoperazone/sulbactam |       |                         |                                         |                                        | Levofloxacin + 0.5× MIC cefoperazone/sulbactam |       |                         |                                         |                                        |
|----------------------------------------------|-------|-------------------------|-----------------------------------------|----------------------------------------|------------------------------------------------|-------|-------------------------|-----------------------------------------|----------------------------------------|
| Strain                                       | Cycle | Levofloxacin MIC (mg/L) | Point mutation in Gyr A ( <i>gyrA</i> ) | Point mutation in GyrB ( <i>gyrB</i> ) | Strain                                         | Cycle | Levofloxacin MIC (mg/L) | Point mutation in Gyr A ( <i>gyrA</i> ) | Point mutation in GyrB ( <i>gyrB</i> ) |
| No. 1                                        | 0     | 0.5                     | N/D                                     | N/D                                    | No. 1                                          | 0     | 0.5                     | N/D                                     | N/D                                    |
|                                              | 1     | 4                       | N/D                                     | N/D                                    |                                                | 1     | 4                       | N/D                                     | N/D                                    |
|                                              | 2     | 8                       | N/D                                     | N/D                                    |                                                | 2     | 8                       | N/D                                     | N/D                                    |
|                                              | 3     | 8                       | N/D                                     | N/D                                    |                                                | 3     | 8                       | N/D                                     | N/D                                    |
|                                              | 4     | 8                       | N/D                                     | N/D                                    |                                                | 4     | 8                       | N/D                                     | N/D                                    |
|                                              | 5     | 8                       | N/D                                     | N/D                                    |                                                | 5     | 8                       | N/D                                     | N/D                                    |
|                                              | 6     | 8                       | N/D                                     | N/D                                    |                                                | 6     | 8                       | N/D                                     | N/D                                    |
| No. 2                                        | 7     | 8                       | N/D                                     | N/D                                    | No. 2                                          | 7     | 8                       | N/D                                     | N/D                                    |
|                                              | 0     | 1                       | N/D                                     | N/D                                    |                                                | 0     | 1                       | N/D                                     | N/D                                    |
|                                              | 1     | 2                       | N/D                                     | N/D                                    |                                                | 1     | 4                       | N/D                                     | N/D                                    |
|                                              | 2     | 2                       | N/D                                     | N/D                                    |                                                | 2     | 8                       | N/D                                     | N/D                                    |
|                                              | 3     | 2                       | N/D                                     | N/D                                    |                                                | 3     | 8                       | N/D                                     | N/D                                    |
|                                              | 4     | 4                       | N/D                                     | N/D                                    |                                                | 4     | 16                      | N/D                                     | N/D                                    |
|                                              | 5     | 8                       | N/D                                     | N/D                                    |                                                | 5     | 16                      | N/D                                     | N/D                                    |
| No. 3                                        | 6     | 8                       | N/D                                     | N/D                                    | No. 3                                          | 6     | 16                      | N/D                                     | N/D                                    |
|                                              | 7     | 8                       | N/D                                     | N/D                                    |                                                | 7     | 16                      | N/D                                     | N/D                                    |
| No. 3                                        | 0     | 1                       | N/D                                     | N/D                                    | No. 3                                          | 0     | 1                       | N/D                                     | N/D                                    |

|       |   |   |     |     |       |   |   |     |     |
|-------|---|---|-----|-----|-------|---|---|-----|-----|
| No. 4 | 1 | 2 | N/D | N/D | No. 4 | 1 | 2 | N/D | N/D |
|       | 2 | 2 | N/D | N/D |       | 2 | 2 | N/D | N/D |
|       | 3 | 2 | N/D | N/D |       | 3 | 2 | N/D | N/D |
|       | 4 | 2 | N/D | N/D |       | 4 | 2 | N/D | N/D |
|       | 5 | 2 | N/D | N/D |       | 5 | 2 | N/D | N/D |
|       | 6 | 2 | N/D | N/D |       | 6 | 2 | N/D | N/D |
|       | 7 | 2 | N/D | N/D |       | 7 | 2 | N/D | N/D |
|       | 0 | 1 | N/D | N/D |       | 0 | 1 | N/D | N/D |
|       | 1 | 1 | N/D | N/D |       | 1 | 1 | N/D | N/D |
|       | 2 | 1 | N/D | N/D |       | 2 | 1 | N/D | N/D |
|       | 3 | 2 | N/D | N/D |       | 3 | 2 | N/D | N/D |
|       | 4 | 2 | N/D | N/D |       | 4 | 2 | N/D | N/D |
|       | 5 | 2 | N/D | N/D |       | 5 | 2 | N/D | N/D |
|       | 6 | 2 | N/D | N/D |       | 6 | 2 | N/D | N/D |
|       | 7 | 2 | N/D | N/D |       | 7 | 2 | N/D | N/D |

---
